# Supplementary material
Source: publisher figshare collection journal article supplement (https://sage.figshare.com/ndownloader/files/16214363)
Supplement: Supplementary file 1 [file 16214363]

## Key words/initial codes

- Family
- Peer support
- Heavy workload
- Preparation for college
- Careers
- real world
- Opportunity
- Guinea pigs
- Small
- Community
- Small community
- Relationships
- Public-private school
- Freedom
- sacrifice
- Sacrificed free time
- “STEM” life
- a chance to explore
- figure out who you are
- drama free
- cool
- exclusive
- free college
- networking opportunities
- teacher relationships
- teachers care
- bond
- big family
- adjustment
- middle school difference

Collapsed

| Relationships                                                                                      | Benefits                                                                                                                                                                                                                                                                                                                                          | Challenges                                                                                                                                                                                           |
|----------------------------------------------------------------------------------------------------|---------------------------------------------------------------------------------------------------------------------------------------------------------------------------------------------------------------------------------------------------------------------------------------------------------------------------------------------------|------------------------------------------------------------------------------------------------------------------------------------------------------------------------------------------------------|
| Small community<br>Bond<br>Big family<br>Teachers care<br>Peer support<br>Kind, loving environment | Opportunities<br>Experience<br>Saves money<br>Connections/networking<br>Saves time<br>Drama free<br>Free college<br>Freedom<br>Learned time management<br>College/career/real world prep<br>Exploration/what you like<br>Drama free<br>Cool, exclusive, public-private<br>Structured curriculum<br>Says something about you<br>Learned discipline | Guinea pig class<br>Friends going elsewhere<br>Limited classes<br>No free time<br>No sports/clubs initially or on-site<br>Had to stop extra-curricular<br>Heavy workload<br>Need more Black teachers |

## INTERVIEW PROTOCOL

### Focus Group-

Warm Up: Request individual introductions. Ask participants to share their name, grade level, any additional information you would like us to know (favorite subject, extracurricular activities, etc.) and tell us why you are here at Wendover.

### Questions:

1. Think about the things that you really like about your school. What are those things and why?
2. What about dislikes?
3. If you could change anything about the school, what would it be? Why?
4. How would you describe your relationships- with teachers, administrators, and other students?
5. What do you think the main differences are between this school and a traditional high school?
6. Discuss the overall pros and cons of attending an early college high school; this early college high school. What would you tell someone thinking about it?
7. Talk to us about the school's focus on STEM.
8. As upperclassmen, did any of you ever think about leaving? What influenced you to stay?
9. What made you want to stay for the 5<sup>th</sup> year?
  - a. Ask juniors and seniors if they are planning to pursue the 5<sup>th</sup> year and why.
10. How would you describe your time here at this school?

### Conclusion

1. Is there anything else you would like to add?
2. Do you have any questions?
3. Who would like to continue the conversation and volunteer for an individual interview?

### Individual:

#### Warming Up Questions

1. Recall information from focus group obtained about the participant. Ask them to tell me more about themselves.

Use these questions alongside focus group notes.

1. Talk to me a little bit about your relationships with your peers and the faculty at the school.
2. Talk to me about how you got here, how was the decision made for you to attend this school.
3. Self-assess, what is different about you since you came to Wendover?
